# Supplementary material
Source: PubMed Central journal article supplement (PMC3663265)
Supplement: supp_tpc.113.109751_tpc109751Supplemental.pdf [file supp_tpc.113.109751_tpc109751Supplemental.pdf]

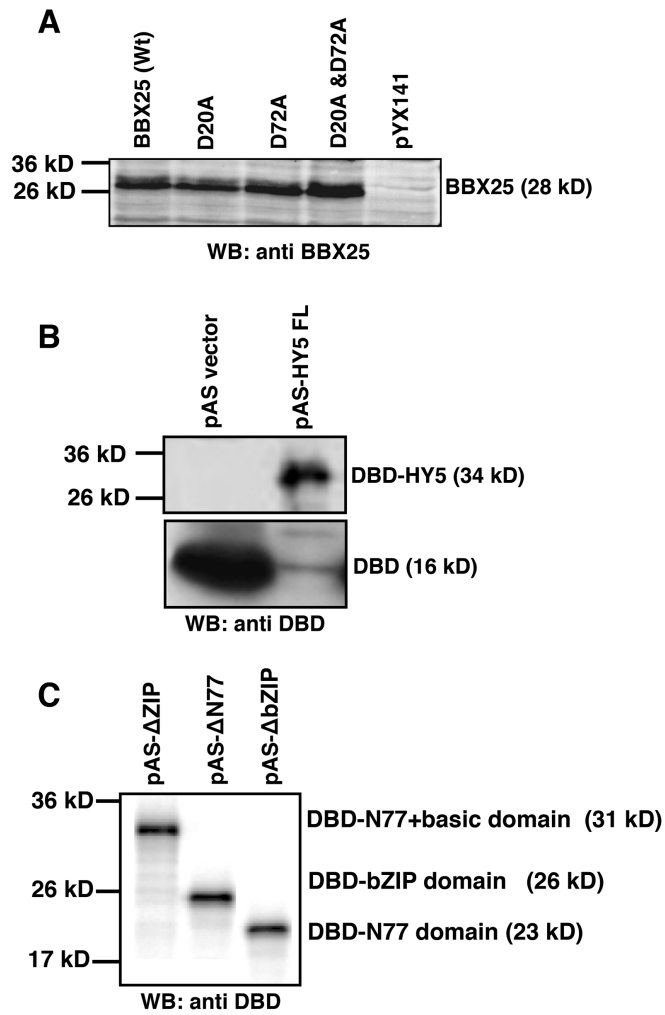

**Supplemental Figure 1. Expression of BBX25 and HY5 Proteins in Yeast.**

(A) to (C) Immunoblots showing similar expression of proteins in the wild-type and point-mutated versions of BBX25 (A), HY5 full length (B) and HY5 truncated versions (C) in yeast.

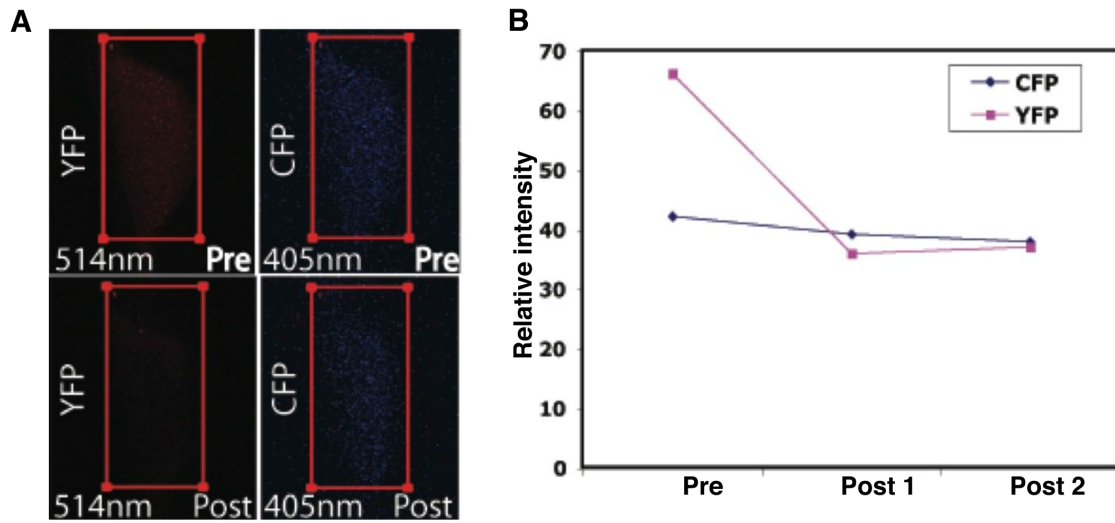

**Supplemental Figure 2. Absence of FRET between Unfused CFP/ YFP.**

(A) Absence of FRET between unfused CFP/ YFP using the same microscopic settings as in Figure 1E.

(B) Relative intensities of both YFP and CFP inside the nucleus measured once before and twice after the bleaching. Bars indicate SD (n = 7).

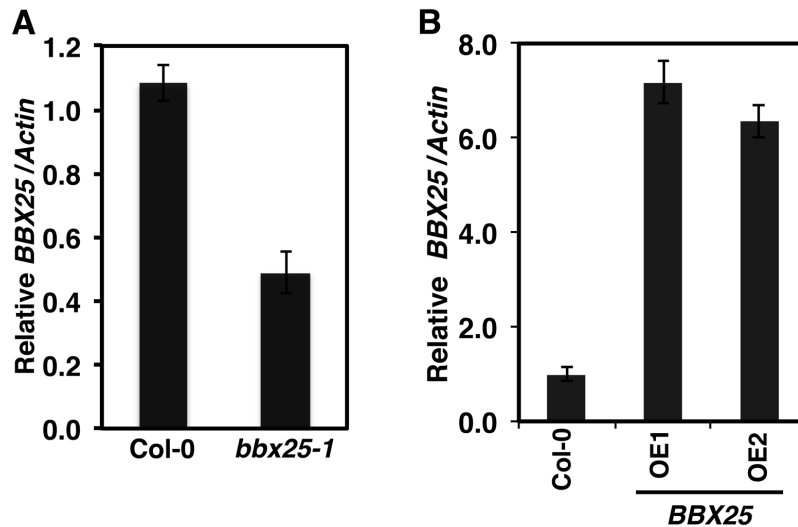

**Supplemental Figure 3. *BBX25* Transcript Accumulation in Mutant and Overexpression Lines.**

(A) Quantitative RT-PCR analysis of *BBX25* expression in Col-0 and *bbx25-1* seedlings grown in WL ( $80 \mu\text{mol m}^{-2} \text{s}^{-1}$ ) for five-days. Error bars represent SE (n= 3).

(B) Quantitative RT-PCR analysis of *BBX25* expression in *BBX25* overexpressing lines grown in WL ( $80 \mu\text{mol m}^{-2} \text{s}^{-1}$ ) for six-days. Error bars represent SE (n= 3).

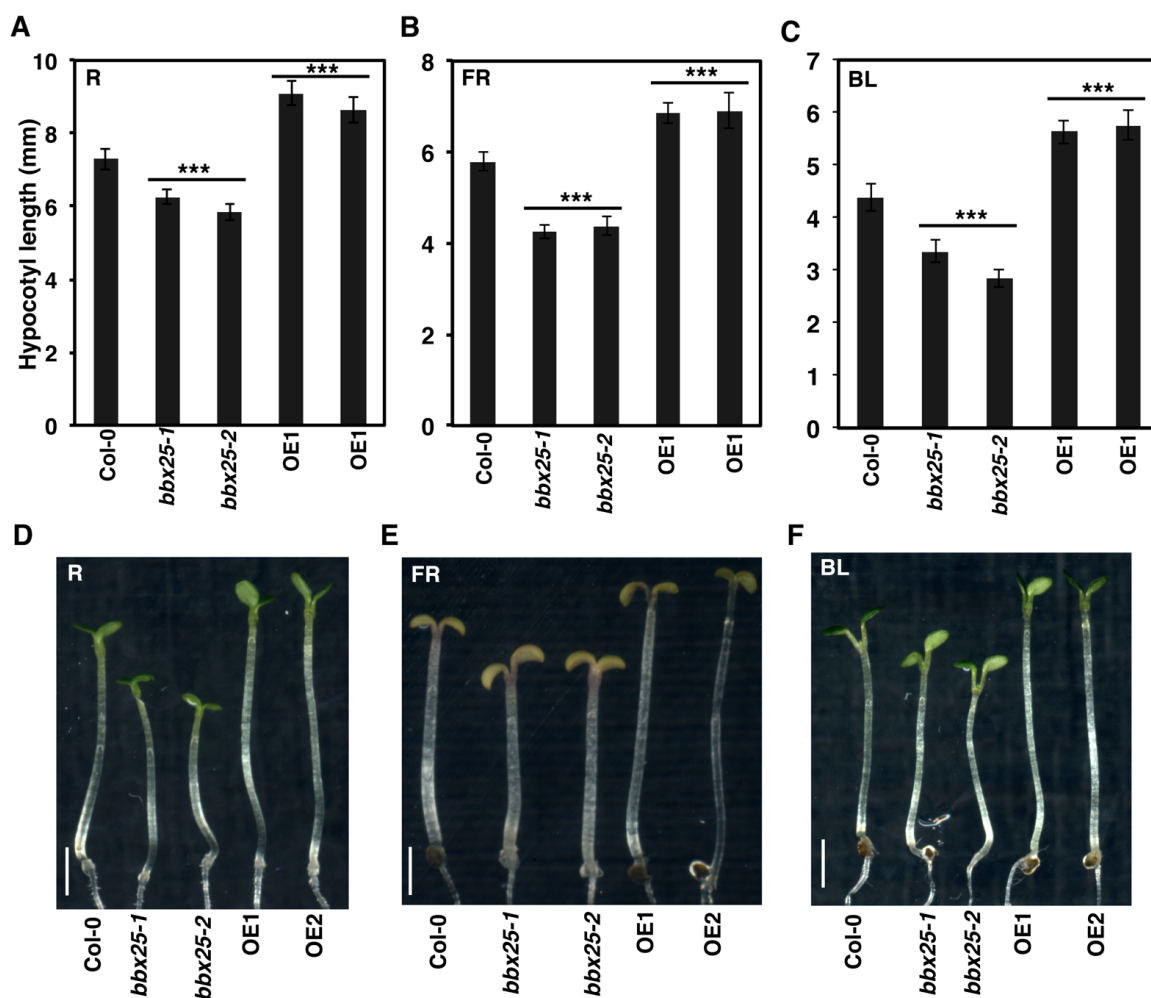

**Supplemental Figure 4. Physiological Characterization of *bbx25* Mutants and Overexpression Lines in Monochromatic Lights.**

(A) to (C) Hypocotyl length of six-day-old seedlings grown in R, FR and BL, respectively. Error bars represent SE ( $n \geq 25$ ). Asterisks show genotypes that differ significantly from Col-0 (Student's t test, \*\*\*  $P \leq 0.001$ ).

(D) to (F) Photographs of seedlings from genotypes showed in A to C. Scale Bar = 1 mm.

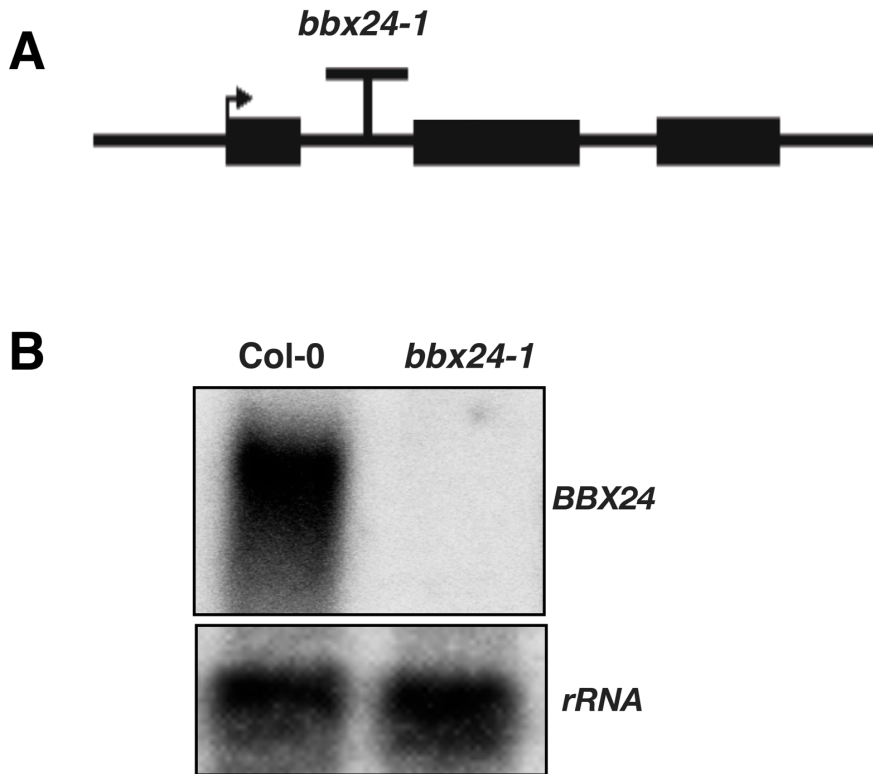

**Supplemental Figure 5. Molecular Characterization of *BBX24* T-DNA Insertion Mutant Alleles.**

**(A)** Schematic representations of *BBX24* (At1g06040) gene. The arrow indicates the position of the start site Met, T indicates the T-DNA insertion positions. Black rectangular boxes depict exons and lines in between these boxes represent introns.

**(B)** RNA gel blot showing *BBX24* transcript accumulation just before dawn in Col-0 and *bbx24-1* mutant.

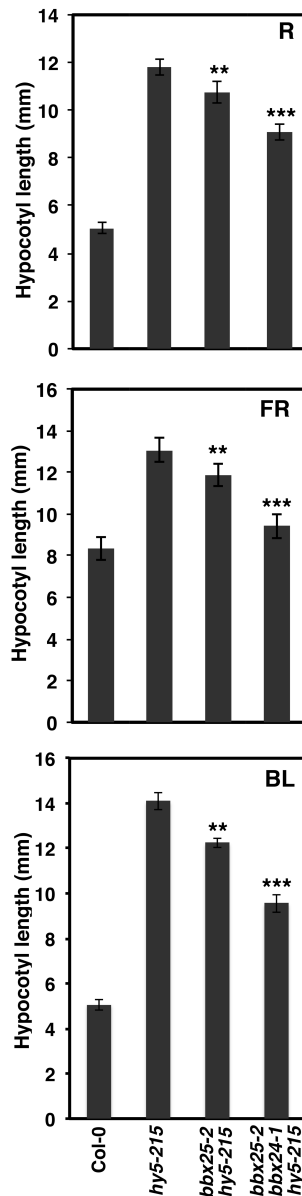

**Supplemental Figure 6. *bbx25-2* and *bbx24-1* Additively Suppress *hy5* Phenotype in Monochromatic Lights.**

Hypocotyl phenotype of five-days-old constant R ( $30 \mu\text{mol m}^{-2} \text{s}^{-1}$ ), FR ( $1 \mu\text{mol m}^{-2} \text{s}^{-1}$ ) and BL ( $10 \mu\text{mol m}^{-2} \text{s}^{-1}$ ) grown seedlings. Error bars indicate SE ( $n \geq 30$  seedlings). Asterisks indicate genotypes either significantly differs from *hy5-215* (Student's t test, \*\*  $P \leq 0.01$ ) or significantly differ from *hy5-215 bbx25-2* (Student's t test, \*\*\*  $P \leq 0.001$ ). Error bars represents SE ( $n \geq 30$ ). All the experiments were performed at least twice with similar results. The graph depicts a representative of one of those experiments.

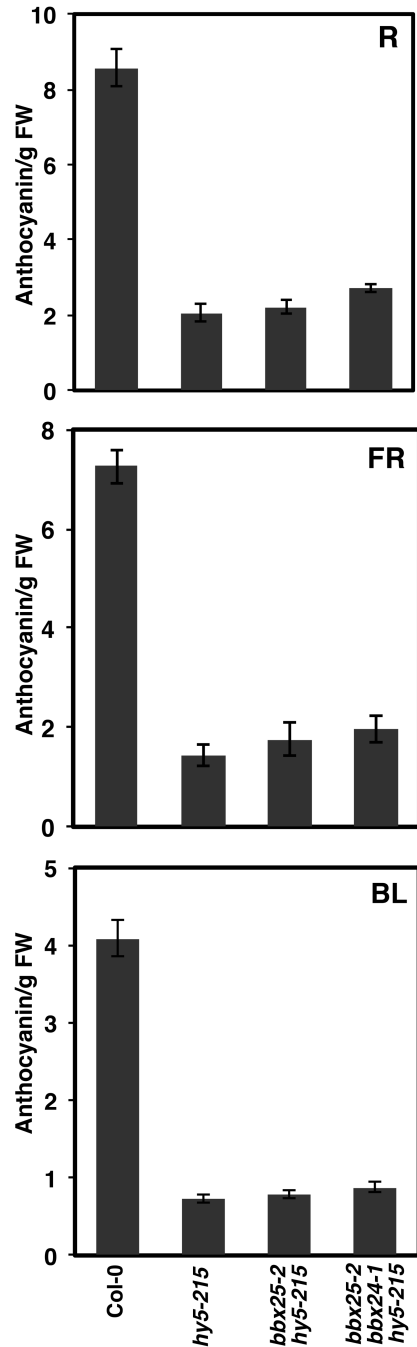

**Supplemental Figure 7. Elevated Accumulation of Anthocyanin in *bbx25-2* and *bbx24-1* is HY5 Dependent in Different Monochromatic Lights.**

Anthocyanin content in five-day-old seedlings of indicated genotypes grown in R ( $60 \mu\text{mol m}^{-2} \text{s}^{-1}$ ), FR ( $0.1 \mu\text{mol m}^{-2} \text{s}^{-1}$ ) and BL ( $20 \mu\text{mol m}^{-2} \text{s}^{-1}$ ). Error bars represent SE (n= 3).

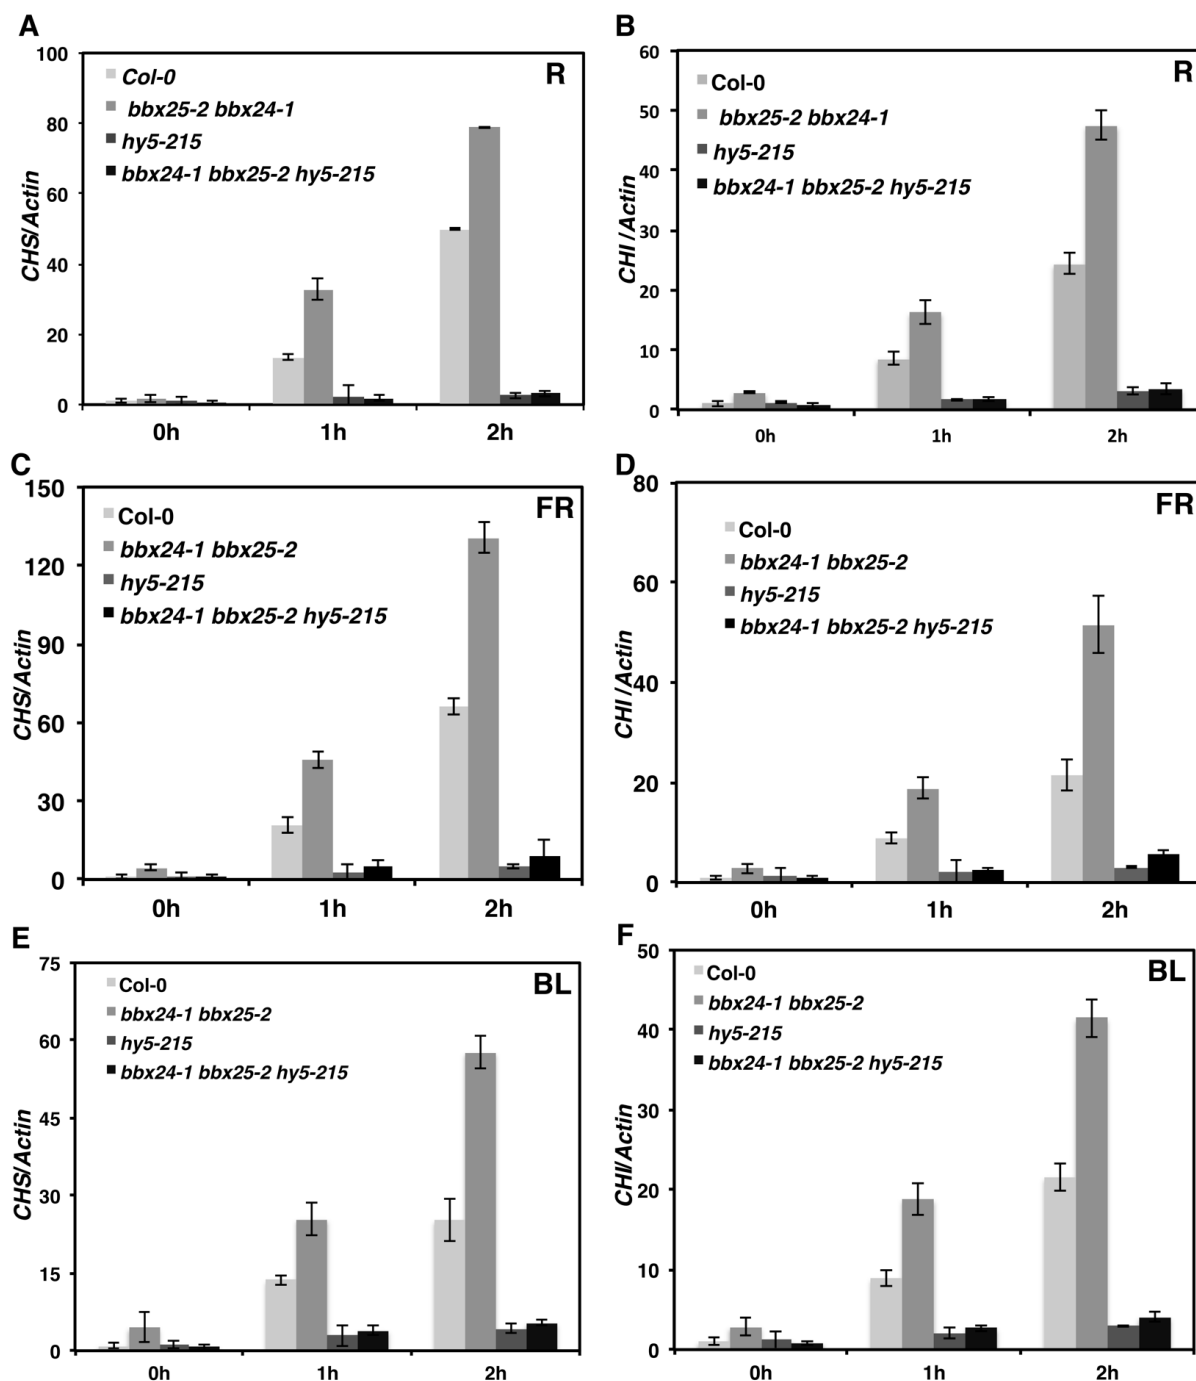

**Supplemental Figure 8. Elevated Expression of *CHS* and *CHI* Genes in *bbx25 bbx24* Mutant is HY5 Dependent in Monochromatic Lights.**

Quantitative RT-PCR analysis of *CHS* (A, C, E) and *CHI* (B, D, F) genes in four-day-old seedlings grown in dark and then irradiated for 0, 1 or 2 h with R ( $100 \mu\text{mol m}^{-2} \text{s}^{-1}$ ), FR ( $10 \mu\text{mol m}^{-2} \text{s}^{-1}$ ) and BL ( $30 \mu\text{mol m}^{-2} \text{s}^{-1}$ ). Error bars represent SE (n=3).



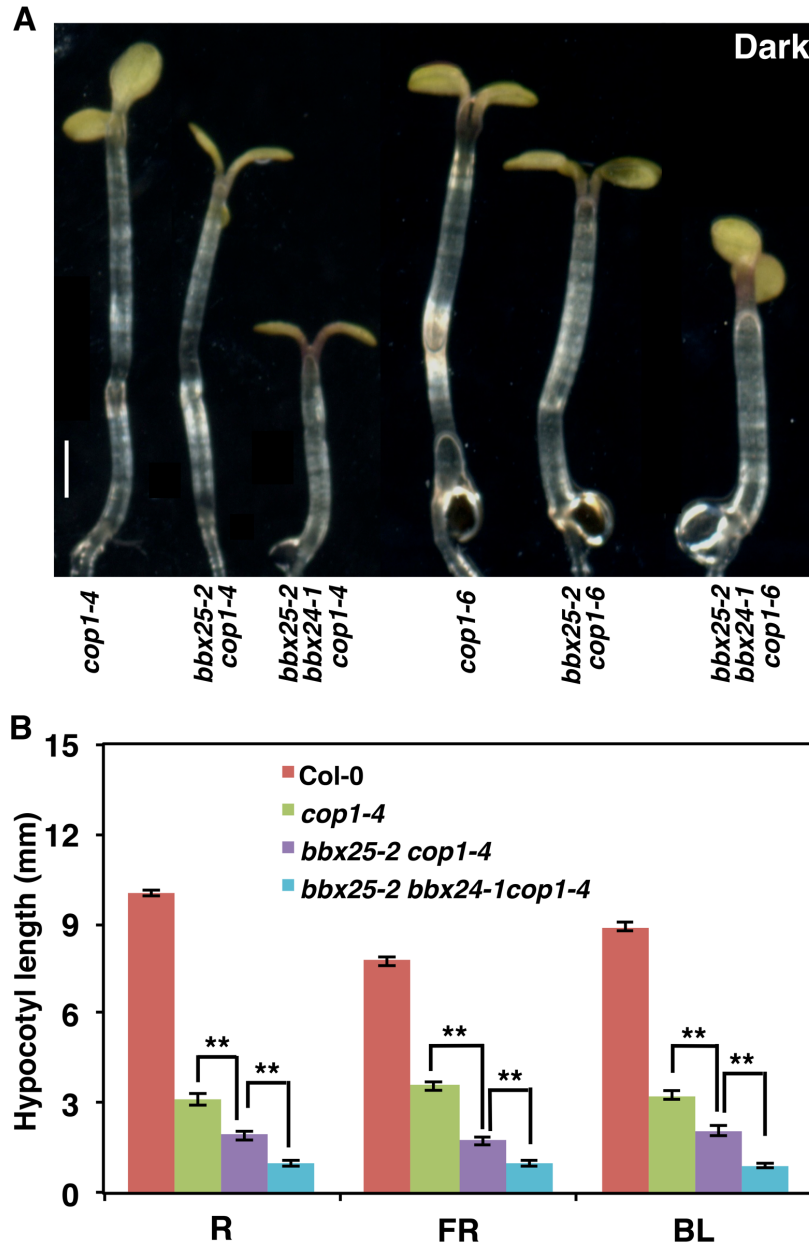

**Supplemental Figure 9. *bbx25* and *bbx24* Additively Enhance *cop1* Phenotype in Monochromatic Lights.**

(A) Photos of Col-0, single, double and triple mutant seedlings grown in dark for five days Scale Bar = 1 mm.

(B) Hypocotyl length of seedlings from indicated genotypes grown in R ( $15 \mu\text{mol m}^{-2} \text{s}^{-1}$ ), FR ( $0.1 \mu\text{mol m}^{-2} \text{s}^{-1}$ ) and BL ( $10 \mu\text{mol m}^{-2} \text{s}^{-1}$ ) for five-days. Error bars represent SE ( $n \geq 30$ ). Asterisks show pairs of genotypes that differ significantly between them (Student's t test,  $** P \leq 0.01$ ).

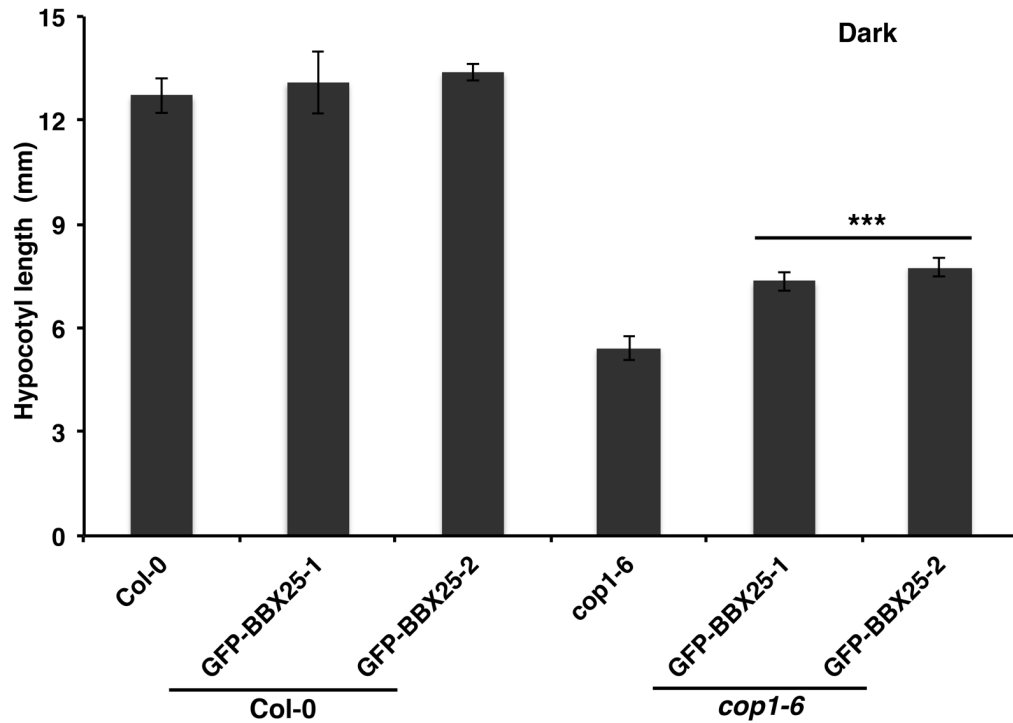

**Supplemental Figure 10. Overexpression of GFP-BBX25 in Col-0 and *cop1-6* Mutant Backgrounds.**

Hypocotyl length of GFP-BBX25 overexpressing lines in Col-0 and *cop1-6* seedlings grown in dark for five days. Error bars represent SE ( $n \geq 35$ ). Asterisks show pair of genotypes that differ significantly from *cop1-6* (Student's t test, \*\*  $P \leq 0.01$ ).

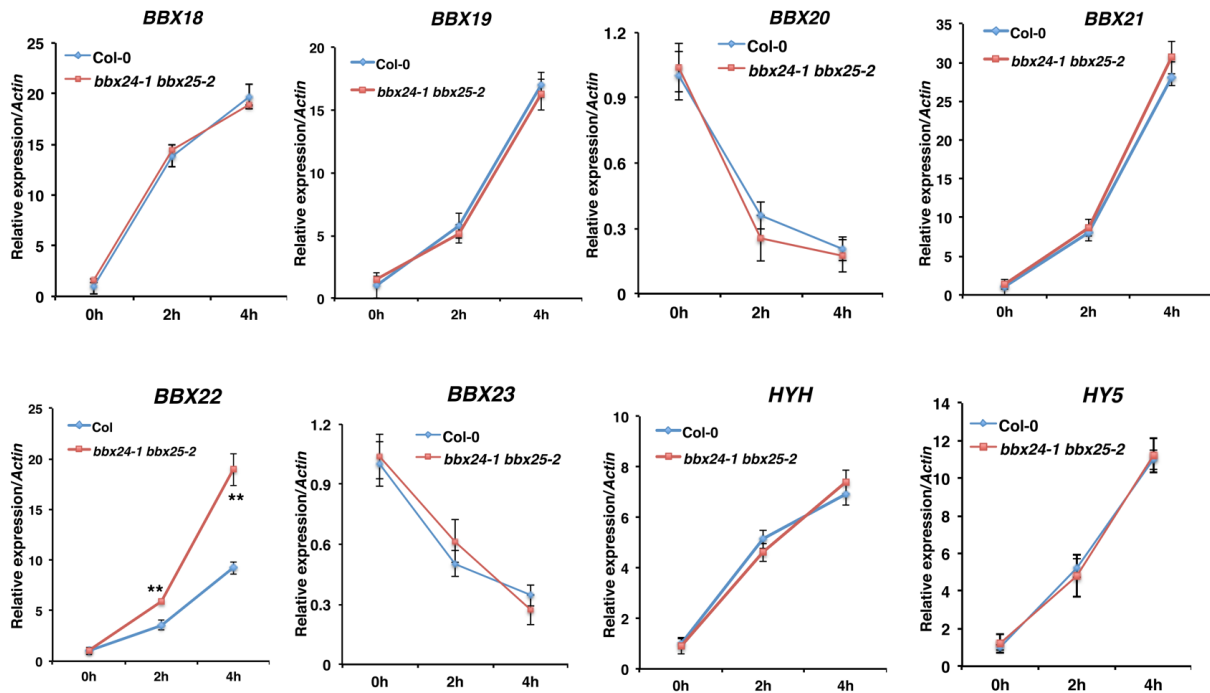

**Supplemental Figure 11. Expression Analysis of Double B-Box (DBB), HY5 and HYH Genes.**

Q-RT PCR analysis of *BBX18-BBX21*, *HY5* and *HYH* genes in Col-0 and *bbx25-2 bbx24-1* seedlings grown in dark for four days and then irradiated with WL ( $80 \mu\text{mol m}^{-2} \text{s}^{-1}$ ) for 0, 2 and 4 h. Error bars represent SE (n= 3). Asterisks show that the gene expression differs significantly between Col-0 and *bbx25-2 bbx24-1* at the same time point (Student's t test, \*\* P  $\leq$  0.01).

**Supplemental Table 1: List of Primers Used in This Study.**

| <b>Primer name</b>                | <b>Direction (5'-----3')</b>           |
|-----------------------------------|----------------------------------------|
| <b>Yeast two-hybrid assay</b>     |                                        |
| BBX25FL-FP                        | GGAATTCCATATGACTGATTACCGGCTACAACCAAC   |
| BBX25FL-RP                        | CCATC GATTTAACCGATTTTTGAAATCAAAC       |
| BBX25B1-FP                        | TGTTGTGCTGCTGCAGCTGCTCT                |
| BBX25B1-RP                        | AGAGCAGCTGCAGCACAACA                   |
| BBX25B2-FP                        | TTCTGTGTAGCGGCTAGGGCTCT                |
| BBX25B2-RP                        | AGAGCCCTAGCCGCTACACAGAA                |
| <b>FRET assay</b>                 |                                        |
| CFP-BBX25-FP                      | AAGGTACCATGAAGATAACAATGTGATGTGT        |
| CFP-BBX25-RP                      | CGTCTAGATTAGCCTAGGTCGGGGAC             |
| <b>RNA gel blots</b>              |                                        |
| BBX24 FP                          | GCCACTGGGATCAAAGTAGCTCTG               |
| BBX24 RP                          | GCCAAGATCAGGGACAATGAAGTG               |
| BBX25FP                           | GAAGGCAGCTTTCATATTCTGTG                |
| BBX25RP                           | GCCTAGGTCGGGGACTAGGAAG                 |
| 18srRNA-FP                        | AATCCTGACACGGGGAGGTAGTGAC              |
| 18srRNA-RP                        | TGAAGGGATGCCTCCACGTAGCTAG              |
| <b>Overexpression of BBX25</b>    |                                        |
| BBX25OEFP                         | CATGCCATGGTCCTCTGATATTCAGATTCTTACTTCTC |
| BBX25OERP                         | GGAAGATCTTTAGCCTAGGTCGGGGACTAGGAAGTGC  |
| <b>Quantitative Real time PCR</b> |                                        |
| ARR7FP                            | ATTGTGGATCGTAAAGTCATCGAG               |
| ARR7RP                            | TCGCTTTACATCTGCTAGCTTCAC               |
| HVA22cFP                          | CTATATGCATCAGTGAAAGCAATAG              |
| HVA22cRP                          | TAGCTCTTTGAGGATCTCTGTAG                |
| FHLFP                             | ATAGTTGCTGTGGAATCTCTAGAC               |
| FHLRP                             | ATTGTTCTATGCTTGATGTAGCAG               |
| ERECTAFP                          | GTCCTACAATCAGCTAACTGGTG                |
| ERECTARP                          | GTAAGCTTCCCAAGCTCTGGTG                 |
| BBX20FP                           | CGGTGTTTTGTTGTGCGGAT                   |
| BBX20RP                           | AATAATGCACGCCTCTCCCC                   |
| BBX21FP                           | CCAAGTCCACCACGCTAACA                   |
| BBX21RP                           | TTTGTGTGTTTCGTTTCGCAGC                 |
| BBX22FP                           | TGGATCATCTAAGGCGGATACT                 |
| BBX22RP                           | GACGCTGTAGGTGGAGACTG                   |
| BBX23FP                           | AAAAGATGCAGCCTCAGCCA                   |
| BBX23RP                           | TGCACAGCATTGCTCTATCC                   |

|                                    |                                       |
|------------------------------------|---------------------------------------|
| BBX25FP                            | GTGTGAGAAAGCTCCGGCCACG                |
| BBX25RP                            | AGTATTTGGCGCATGGGTCGCC                |
| HY5FP                              | CCATCAAGCAGCGAGAGGTCATCAA             |
| HY5RP                              | CGCCGATCCAGATTCTCTACCGGAA             |
| HYHFP                              | CCCACAAGAAGCACAAAACCTGAGGAAA          |
| HYHRP                              | CTTCCACGGCGGCGTTTAGCTGTAGAGA          |
| Actin2-FP                          | GCCAGTGGTTCGTACAACCGGTATTG            |
| Actin2-RP                          | TTCCCGCTCTGCTGTTGTGGTG                |
| <b>Protoplast Assay</b>            |                                       |
| BBX 24FP                           | CATGCCATGGCAAATCCTTATCTTCTCTCTTTCAC   |
| BBX24RP                            | GGAAGATCTTTAGCCAAGATCAGGGACAATGAAG    |
| BBX25 FP                           | CATGCCATGGCCAAAATCCTCTTAAAATCTCATAAAG |
| BBX 25RP                           | GGAAGATCTTTAGCCTAGGTCGGGGACTAGGAAG    |
| HY5FP                              | CATGCCATGGCAGAGATCTGACGGCGGTAGCCAG    |
| HY5RP                              | GGAAGATCTTCAAAGGCTTGCATCAGCATTAG      |
| BBX21 promo FP                     | TCATTTCCGTGCAAAAATGTTAATTTTG          |
| BBX21 promo RP                     | CTTCTCTTATCTCAAACCTCATCCAG            |
| <b>Genotyping of T-DNA mutants</b> |                                       |
| LB3                                | TAGCATCTGAATTTTCATAACCAATCTCGATACAC   |
| BBX25LP                            | AGGCCAGAAAGAGAAGTACTGAGG              |
| BBX25 RP                           | GCCTTTTGTCTTTCCCTTG                   |
| Spm1                               | CTTATTTTCAGTAAGAGTGTGGGGTTTTTGG       |
| BBX25LP1                           | ACTGCTTTTGTCTCTCAAGTCATTTGTCT         |
| BBX25RP1                           | CCTGCAAGTCAACAAAGATGAACACAAGA         |
| Lb1                                | GCGTGGACCGCTTGCTGCAACT                |
| BBX24LP                            | TTGCTGCTGGCTTGTGGATTT                 |
| BBX24RP                            | AAAGAGTGGGACCCGCAAGAG                 |
